1 **Organohalide-respiring *Desulfoluna* species isolated from marine**  
2 **environments**

3

4 Peng Peng,<sup>a</sup> Tobias Goris,<sup>b</sup> Yue Lu,<sup>c</sup> Bart Nijse,<sup>d</sup> Anna Burrichter,<sup>i,j</sup> David Schleheck,<sup>i,j</sup>  
5 Jasper J. Koehorst,<sup>d</sup> Jie Liu,<sup>h</sup> Detmer Sipkema,<sup>a</sup> Jaap S. Sinninghe Damste,<sup>e,f</sup> Alfons J. M.  
6 Stams,<sup>a,g</sup> Max M. Häggblom,<sup>h</sup> Hauke Smidt,<sup>a</sup> Siavash Atashgahi<sup>a\*</sup>

7

8 <sup>a</sup> Laboratory of Microbiology, Wageningen University & Research, Stippeneng 4, 6708 WE  
9 Wageningen, The Netherlands

10 <sup>b</sup> Department of Applied and Ecological Microbiology, Institute of Microbiology, Friedrich  
11 Schiller University, 07743 Jena, Germany

12 <sup>c</sup> College of Environmental Science and Engineering, Hunan University, 410082  
13 Changsha, China

14 <sup>d</sup> Laboratory of Systems and Synthetic Biology, Wageningen University & Research,  
15 Stippeneng 4, 6708 WE Wageningen, The Netherlands

16 <sup>e</sup> Department of Marine Microbiology and Biogeochemistry, NIOZ Royal Netherlands  
17 Institute for Sea Research, P.O. Box 59, 1790 AB Den Burg, The Netherlands

18 <sup>f</sup> Department of Earth Sciences, Faculty of Geosciences, Utrecht University, P.O. Box  
19 80.121, 3508 TA Utrecht, The Netherlands

20 <sup>g</sup> Centre of Biological Engineering, University of Minho, Campus de Gualtar, 4710-057  
21 Braga, Portugal

22 <sup>h</sup> Department of Biochemistry and Microbiology, Rutgers University, New Brunswick, NJ  
23 08901, USA

24 <sup>i</sup> Department of Biology, University of Konstanz, 78457 Konstanz, Germany

25 <sup>j</sup> The Konstanz Research School Chemical Biology, University of Konstanz, 78457  
26 Konstanz, Germany

27

28 \*Address correspondence to Siavash Atashgahi: [siavash.atashgahi@wur.nl](mailto:siavash.atashgahi@wur.nl)

29 **Abstract**

30 The genus *Desulfoluna* comprises two anaerobic sulfate-reducing strains, *D. spongiiphila*  
31 AA1<sup>T</sup> and *D. butyratoxydans* MSL71<sup>T</sup>, of which only the former was shown to perform  
32 organohalide respiration (OHR). Here we isolated a third member of this genus from  
33 marine intertidal sediment, designed *D. spongiiphila* strain DBB. All three *Desulfoluna*  
34 strains harbour three reductive dehalogenase gene clusters (*rdhABC*) and corrinoid  
35 biosynthesis genes in their genomes. Brominated but not chlorinated aromatic  
36 compounds were dehalogenated by all three strains. The *Desulfoluna* strains maintained  
37 OHR in the presence of 20 mM sulfate or 20 mM sulfide, which often negatively affect  
38 OHR. Strain DBB sustained OHR with 2% oxygen in the gas phase, in line with its genetic  
39 potential for reactive oxygen species detoxification. Reverse transcription-quantitative  
40 PCR (RT-qPCR) revealed differential induction of *rdhA* genes in strain DBB in response to  
41 1,4-dibromobenzene or 2,6-dibromophenol. Proteomic analysis confirmed differential  
42 expression of *rdhA1* with 1,4-dibromobenzene, and revealed a possible electron transport  
43 chain from lactate dehydrogenases and pyruvate oxidoreductase to RdhA1 via  
44 menaquinones and either RdhC, or Fix complex (electron transfer flavoproteins), or Qrc  
45 complex (Type-1 cytochrome c3:menaquinone oxidoreductase).

## 46 **Introduction**

47 More than 5,000 naturally produced organohalides have been identified, some of  
48 which have already been present in a variety of environments for millions of years [1]. In  
49 particular, marine environments are a rich source of chlorinated, brominated and  
50 iodinated organohalides produced by marine algae, seaweeds, sponges, and bacteria [2],  
51 Fenton-like [3] and photochemical reactions, as well as volcanic activities [4, 5]. Such a  
52 natural and ancient presence of organohalogens in marine environments may have  
53 primed development of various microbial dehalogenation metabolisms [6]. Furthermore,  
54 marine environments and coastal regions in particular are also commonly reported to be  
55 contaminated with organohalogens from anthropogenic sources [7].

56 During organohalide respiration (OHR) organohalogens are used as electron  
57 acceptors, and their reductive dehalogenation is coupled to energy conservation [8-10].  
58 This process is mediated by reductive dehalogenases (RDases), which are membrane-  
59 associated, corrinoid-dependent, and oxygen sensitive proteins [9-11]. The  
60 corresponding *rdh* gene clusters usually consists of *rdhA* encoding the catalytic subunit,  
61 *rdhB* encoding a putative membrane anchor protein [10], and a variable set of accessory  
62 genes encoding RdhC and other proteins likely involved in regulation, maturation and/or  
63 electron transport [12, 13]. The electron transport chain from electron donors to RDases  
64 has been classified into quinone-dependent (that rely on menaquinones as electron  
65 shuttles between electron donors and RDases) and quinone-independent pathways [9,  
66 10, 14]. Recent studies suggested that RdhC may serve as electron carrier during OHR in  
67 *Firmicutes* [15, 16].

68 OHR is mediated by organohalide-respiring bacteria (OHRB), which belong to a  
69 broad range of phylogenetically distinct bacterial genera. OHRB belonging to *Chloroflexi*  
70 and the genus *Dehalobacter* (*Firmicutes*, e.g. *Dehalobacter restrictus*) are specialists  
71 restricted to OHR, whereas proteobacterial OHRB and members of the genus  
72 *Desulfitobacterium* (*Firmicutes*, e.g. *Desulfitobacterium hafniense*) are generalists with a  
73 versatile metabolism [17, 18]. Numerous studies have reported OHR activity and  
74 occurrence of OHRB and *rdhA* genes in marine environments [6, 19-21]. Recent genomic

75 [22-24] and single-cell genomic [25] analyses revealed widespread occurrence of *rdh*  
76 gene clusters in marine *Deltaproteobacteria*, indicating untapped potential for OHR.  
77 Accordingly, OHR metabolism was experimentally verified in three *Deltaproteobacteria*  
78 strains, not previously known as OHRB [23].

79 OHRB, and in particular members of the *Chloroflexi*, are fastidious microbes, and  
80 are susceptible to inhibition by oxygen [26], sulfate [27] or sulfide [28, 29]. In the  
81 presence of both 3-chlorobenzoate and either sulfate, sulfite or thiosulfate, *Desulfomonile*  
82 *tiedjei* isolated from sewage sludge preferentially performed sulfur oxyanion reduction  
83 [30], and OHR inhibition was suggested to be caused by downregulation of *rdh* gene  
84 expression [30]. In contrast, concurrent sulfate reduction and OHR was observed in  
85 *Desulfoluna spongiiphila* AA1<sup>T</sup> isolated from the marine sponge *Aplysina aerophoba* [20],  
86 and three newly characterized organohalide-respiring marine deltaproteobacterial strains  
87 [23]. Sulfate- and sulfide-rich marine environments may have exerted a selective  
88 pressure resulting in development of sulfate- and sulfide-tolerant OHRB.

89 The genus *Desulfoluna* comprises two anaerobic sulfate-reducing strains, *D.*  
90 *spongiiphila* AA1<sup>T</sup> isolated from the bromophenol-producing marine sponge *Aplysina*  
91 *aerophoba* [20, 31], and *D. butyratoxydans* MSL71<sup>T</sup> isolated from estuarine sediments  
92 [32]. Strain AA1<sup>T</sup> can reductively dehalogenate various bromophenols but not  
93 chlorophenols. The genome of strain AA1<sup>T</sup> harbours three *rdhA* genes, one of which was  
94 shown to be induced by 2,6-dibromophenol [21]. The OHR potential and the genome of  
95 strain MSL71<sup>T</sup> have not been studied before. In this study, a third member of the genus  
96 *Desulfoluna*, designated *D. spongiiphila* strain DBB, was isolated from a marine intertidal  
97 sediment. The OHR metabolism of strain DBB and of strain MSL71<sup>T</sup> was verified in this  
98 study. In line with former reports [22-25], this study further reinforces an important role  
99 of marine organohalide-respiring *Deltaproteobacteria* in halogen, sulfur and carbon  
100 cycling.

101

## 102 **Materials and Methods**

103

104 **Chemicals**

105 Brominated, iodinated and chlorinated benzenes and phenols were purchased  
106 from Sigma-Aldrich. Other organic and inorganic chemicals used in this study were of  
107 analytical grade.

108

109 **Bacterial strains**

110 *D. spongiiphila* AA1<sup>T</sup> (DSM 17682<sup>T</sup>) and *D. butyratoxydans* MSL71<sup>T</sup> (DSM 19427<sup>T</sup>)  
111 were obtained from the German Collection of Microorganisms and Cell Cultures (DSMZ,  
112 Braunschweig, Germany), and were cultivated as described previously [20, 32].

113

114 **Enrichment, isolation and cultivation of strain DBB**

115 Surface sediment of an intertidal zone, predominantly composed of shore  
116 sediment, was collected at the shore in L'Escala, Spain (42°7'35.27"N 3°8'6.99"E). Five  
117 grams of sediment were transferred into 120-ml bottles containing 50 ml of anoxic  
118 medium [33] with lactate and 1,4-dibromobenzene (1,4-DBB) as the electron donor and  
119 acceptor, respectively. Sediment-free cultures were obtained by transferring the  
120 suspensions of the enrichment culture to fresh medium. A pure culture of a 1,4-DBB  
121 debrominating strain, designated as *D. spongiiphila* strain DBB, was obtained from a  
122 dilution series on solid medium with 0.8% low-melting point agarose (Sigma-Aldrich). A  
123 detailed description of enrichment, isolation and physiological characterization of strain  
124 DBB is provided in the Supplementary Information.

125

126 **Cell morphology and cellular fatty acids analyses**

127 Cell morphology and motility were observed using a LEICA DM 2000 Microscope  
128 and a JEOL-6480LV Scanning Electron Microscope (SEM). Actively growing cells were  
129 directly observed under the 100x magnification objective of the LEICA DM 2000  
130 Microscope. Sample fixation and dehydration for SEM were performed as described  
131 previously [34]. The cellular fatty acid composition was analysed from 500 ml cultures of  
132 AA1<sup>T</sup>, DBB and MSL71<sup>T</sup>, which were grown with 20 mM lactate and 10 mM sulfate. Fatty

133 acids in the cell were analysed by acid hydrolysis of total cell material following a method  
134 previously described [35].

135

### 136 **DNA extraction and bacterial community analysis**

137 DNA of the intertidal sediment (5 g) and the 1,4-DBB-respiring enrichment culture  
138 (10 ml) was extracted using the DNeasy PowerSoil Kit (MO-BIO, CA, USA). A 2-step PCR  
139 strategy was applied to generate barcoded amplicons from the V1–V2 region of bacterial  
140 16S rRNA genes as described previously [36]. Sequence analysis was performed using  
141 NG-Tax [37]. Operational taxonomic units (OTUs) were assigned taxonomy using uclust  
142 [38] in an open reference approach against the SILVA 16S rRNA gene reference database  
143 (LTPs128\_SSU) [39]. Finally, a biological observation matrix (biom) file was generated  
144 and sequence data were further analyzed using Quantitative Insights Into Microbial  
145 Ecology (QIIME) v1.2 [40].

146

### 147 **Genome sequencing and annotation**

148 DNA of DBB and MSL71<sup>T</sup> cells was extracted using the MasterPure™ Gram Positive  
149 DNA Purification Kit (Epicentre, WI, USA). The genomes were sequenced using the  
150 Illumina HiSeq2000 paired-end sequencing platform (GATC Biotech, Konstanz,  
151 Germany). The genome of strain DBB was further sequenced by PacBio sequencing  
152 (PacBio RS) to obtain longer read lengths. Optimal assembly kmer size for strain DBB  
153 was detected using kmergenie (v.1.7039) [41]. A *de novo* assembly with Illumina  
154 HiSeq2000 paired-reads was made with assembler Ray (v2.3.1) [41] using a kmer size of  
155 81. A hybrid assembly for strain DBB with both the PacBio and the Illumina HiSeq reads  
156 was performed with SPAdes (v3.7.1, kmer size: 81) [42]. The two assemblies were  
157 merged using the tool QuickMerge (v1) [43]. Duplicated scaffolds were identified with  
158 BLASTN [44] and removed from the assembly. Assembly polishing was performed with  
159 Pilon (v1.21) [45] using the Illumina HiSeq reads. Optimal assembly kmer size for strain  
160 MSL71<sup>T</sup> was also identified using kmergenie (v.1.7039), and a *de novo* assembly with  
161 Illumina HiSeq2000 paired-end reads was performed with SPAdes (v3.11.1) with a kmer-

162 size setting of 79,101,117. FastQC and Trimmomatic (v0.36) [46] was used for read  
163 inspection and trimming using the trimmomatic parameters: TRAILING:20 LEADING:20  
164 SLIDINGWINDOW:4:20 MINLEN:50. Trimmed reads were mapped with Bowtie2 v2.3.3.1  
165 [47]. Samtools (v1.3.1) [48] was used for converting the bowtie output to a sorted and  
166 indexed bam file. The assembly was polished with Pilon (v1.21).

167

### 168 **Transcriptional analysis of the *rdhA* genes of *D. spongiiphila* DBB**

169 Transcriptional analysis was performed using DBB cells grown with lactate (20  
170 mM), sulfate (10 mM) and either 1,4-DBB (1 mM) or 2,6-DBP (0.2 mM). DBB cells grown  
171 with lactate and sulfate but without any organohalogenes were used as control. Ten  
172 replicate microcosms were prepared for each experimental condition, and at each  
173 sampling time point, two microcosms were randomly selected and sacrificed for RNA  
174 isolation as described previously [49]. RNA was purified using RNeasy columns (Qiagen,  
175 Venlo, The Netherlands) followed by DNase I (Roche, Almere, The Netherlands)  
176 treatment. cDNA was synthesized from 200 ng total RNA using SuperScript™ III Reverse  
177 Transcriptase (Invitrogen, CA, USA) following manufacturer's instructions. RT-qPCR  
178 assays were performed as outlined in Supplementary Information.

179

### 180 **Protein extraction and proteomic analysis**

181 Triplicate cultures of strain DBB grown with lactate/sulfate (LS condition) or  
182 lactate/sulfate/1,4-DBB (LSD condition) were used for proteomic analysis. Preparation of  
183 cell-free extracts (CFE), determination of protein concentration, SDS-PAGE purification of  
184 total proteins in CFE and of proteins in membrane fragments, and the peptide  
185 fingerprinting-mass spectrometry (PF-MS) analysis, were performed as outlined in  
186 Supplementary Information. Statistical analysis was performed using prostar proteomics  
187 [50]. Top three peptide area values were normalized against all columns. The values of  
188 proteins detected in at least two of the three replicates were differentially compared and  
189 tested for statistical significance. Missing values were imputed using the SLSA function of  
190 prostar, and hypothesis testing with a student's t-test was performed for LSD vs LS

191 growth conditions. The  $p$ -values were Benjamini-Hochberg corrected and proteins with  $p$ -  
192 values below 0.05 and a log<sub>2</sub> value of 1 or larger were considered statistically  
193 significantly up- or downregulated.

194

## 195 **Analytical methods**

196 Halogenated benzenes and benzene were analyzed on a GC equipped with an Rxi-  
197 5Sil capillary column (Retek, PA, USA) and a flame ionization detector (GC-FID,  
198 Shimadzu 2010). Halogenated phenols and phenol were analyzed on a Thermo Scientific  
199 Accela HPLC System equipped with an Agilent Poroshell 120 EC-C18 column and a UV/Vis  
200 detector. Organic acids and sugars were analyzed using a ThermoFisher Scientific  
201 SpectraSYSTEM™ HPLC equipped with an Agilent Metacarb 67H column and RI/UV  
202 detectors. Sulfate, sulfite and thiosulfate were analyzed using a ThermoFisher Scientific  
203 Dionex™ ICS-2100 Ion Chromatography System equipped with a Dionex Ionpac  
204 analytical column and a suppressed conductivity detector. Cell growth was determined by  
205 measuring OD<sub>600</sub> using a WPA CO8000 cell density meter (Biochrom, Cambridge, UK).  
206 Sulfide was measured by a photometric method using methylene blue as described  
207 previously [51].

208

## 209 **Strain and data availability**

210 *D. spongiiphila* strain DBB was deposited in DSMZ under accession number DSM  
211 104433. The 16S rRNA gene sequences of strain DBB were deposited in GenBank  
212 (accession numbers: MK881098—MK881099). The genome sequences of strains DBB and  
213 MSL71 were deposited in the European Bioinformatics Institute (EBI, Project ID:  
214 PRJEB31368). A list of proteins detected from strain DBB under LS and LDS growth  
215 conditions is available in Supplementary Datasets 1 (Soluble fraction) and 2 (Membrane  
216 fraction).

217

## 218 **Results and discussion**

219



## 220 **Enrichment of 1,4-DBB debrominating cultures and isolation of strain DBB**

221 Reductive debromination of 1,4-DBB to bromobenzene (BB) and benzene was  
222 observed in the original cultures containing intertidal sediment (Fig. 1A, 1B).  
223 Debromination of 1,4-DBB was maintained in the subsequent sediment-free transfer  
224 cultures (Fig. 1C). However, benzene was no longer detected and BB was the only  
225 debromination product, indicating loss of the BB-debrominating population. Up to date,  
226 the only known OHRB that can debrominate BB to benzene is *Dehalococcoides mccartyi*  
227 strain CBDB1 [52]. 1,4-DBB debromination to BB was stably maintained during  
228 subsequent transfers (data not shown) and after serial dilution (Fig. 1D). Bacterial  
229 community analysis showed an increase in the relative abundance of *Deltaproteobacteria*  
230 from ~2% in the intertidal sediment at time zero to ~13% after 104 days of enrichment  
231 (Fig. 1E). The genus *Desulfoluna* was highly enriched and comprised more than 80%  
232 relative abundance in the most diluted culture ( $10^7$  dilution) (Fig. 1E).

233 Single colonies were observed in roll tubes with 0.8% low-melting agarose after  
234 15 days of incubation. Among the six single colonies randomly selected and transferred  
235 to liquid media, one showed 1,4-DBB debromination (Fig. 1F) which was again subjected  
236 to the roll tube isolation procedure to ensure purity. The final isolated strain was  
237 designated DBB.

238

## 239 **Characterization of the *Desulfoluna* strains**

240 Cells of strain DBB were slightly curved rods with a length of 1.5 to 3  $\mu\text{m}$  and a  
241 diameter of 0.5  $\mu\text{m}$  as revealed by SEM (Fig. S1A, S1B), which was similar to strain AA1<sup>T</sup>  
242 (Fig. S1C) and MSL71<sup>T</sup> (Fig. S1D). In contrast to strain AA1<sup>T</sup> [20], but similar to strain  
243 MSL71<sup>T</sup> [32], strain DBB was motile when observed by light microscopy, with evident  
244 flagella being observed by SEM (Fig. S1A, B).

245 The cellular fatty acid profiles of the three strains consisted mainly of even-  
246 numbered saturated and mono-unsaturated fatty acids (Table S2).

247 Strain DBB used lactate, pyruvate, formate, malate and butyrate as electron  
248 donors for sulfate reduction (Table 1). Lactate was degraded to acetate, which

249 accumulated without further degradation, and sulfate was reduced to sulfide (Fig. S1A).  
250 In addition, sulfite and thiosulfate were utilized as electron acceptors with lactate as the  
251 electron donor (Table 1). Sulfate and 1,4-DBB could be concurrently utilized as electron  
252 acceptors by strain DBB (Fig. S2). Independent of the presence of sulfate in the medium,  
253 strain DBB stoichiometrically debrominated 1,4-DBB to bromobenzene (BB), and 2-  
254 bromophenol (2-BP), 4-bromophenol (4-BP), 2,4-bromophenol (2,4-DBP), 2,6-DBP,  
255 2,4,6-tribromophenol (2,4,6-TBP), 2-iodophenol (2-IP) and 4-iodophenol (4-IP) to phenol  
256 (Table 1) using lactate as the electron donor. Hydrogen was not used as an electron  
257 donor for 1,4-DBB debromination (data not shown). Strain DBB was unable to  
258 dehalogenate the tested chlorinated aromatic compounds and several other  
259 bromobenzenes listed in Table 1. This is in accordance with the dehalogenating activity  
260 reported for strain AA1<sup>T</sup> that was unable to use chlorinated aromatic compounds as  
261 electron acceptors [20]. The majority of the known organohalogens from marine  
262 environments are brominated [1] and hence marine OHRB may be less exposed to  
263 organochlorine compounds in their natural habitats. For instance, strain AA1<sup>T</sup> was  
264 isolated from the sponge *Aplysina aerophoba* [20] in which organobromine metabolites  
265 can account for over 10% of the sponge dry weight [53].

266

### 267 **Genomic and phylogenetic characterization of the *Desulfoluna* strains**

268 The genome of strain DBB is closed and consists of a single chromosome with a  
269 size of 6.68 Mbp (Fig. S3). The genome of strain AA1<sup>T</sup> (GenBank accession number:  
270 NZ\_FMUX01000001.1) and strain MSL71<sup>T</sup> (sequenced in this study) are draft genomes  
271 with similar G+C content (Table 1). The average nucleotide identity (ANI) of the DBB  
272 genome to AA1<sup>T</sup> and MSL71<sup>T</sup> genomes was 98.5% and 85.9%, respectively. This  
273 indicates that DBB and AA1<sup>T</sup> strains belong to the same species of *D. spongiiphila* [54].  
274 16S rRNA gene and protein domain-based phylogenetic analyses with other genera of the  
275 *Desulfobacteraceae* placed *Desulfoluna* strains in a separate branch of the corresponding  
276 phylogenetic trees (Fig. 2). Whole genome alignment of strains DBB, AA1<sup>T</sup> and MSL71<sup>T</sup>  
277 revealed the presence of 11 locally colinear blocks (LCBs) with several small regions of

278 inversion and rearrangement (Fig. S4). A site-specific recombinase gene (DBB\_14420)  
279 was found in one of the LCBs. The same gene was also found in the corresponding  
280 inversed and rearranged LCBs in AA1<sup>T</sup> (AA1\_11599) and MSL71<sup>T</sup> (MSL71\_ 48620),  
281 suggesting a role of the encoded recombinase in genomic rearrangement in the  
282 *Desulfoluna* strains.

283

#### 284 **Comparison of the *rdh* gene region of the *Desulfoluna* strains**

285 Similar to strain AA1<sup>T</sup> [21], the genomes of strains DBB and MSL71<sup>T</sup> also harbor  
286 three *rdhA* genes. The amino acid sequences of the RdhA homologs in DBB share >99%  
287 identity to the corresponding RdhAs in AA1<sup>T</sup>, and 80–97% identity with the  
288 corresponding RdhAs in MSL71<sup>T</sup> (Fig 3). However, the three distinct RdhA homologs in  
289 the *Desulfoluna* strains share low identity (20–30%) with each other and form three  
290 distant branches in the phylogenetic tree of RdhAs [18], and cannot be grouped with any  
291 of the currently known RdhA groups (Fig. S5). Therefore, we propose three new RdhA  
292 homolog groups, RdhA1 including DBB\_38400, AA1\_07176 and MSL71\_22580; RdhA2  
293 including DBB\_36010, AA1\_02299 and MSL71\_20560; RdhA3 including DBB\_45880,  
294 AA1\_11632 and MSL71\_30900 (Fig 3, Fig. S5).

295 The *rdh* gene clusters in DBB and MSL71<sup>T</sup> show a similar gene order to the  
296 corresponding *rdh* gene clusters in AA1<sup>T</sup> (Fig. 3), except that the *rdhA1* gene cluster of  
297 MSL71<sup>T</sup> lacks *rdhB* and *rdhC*. Genes encoding sigma-54-dependent transcriptional  
298 regulators in the *rdhA1* and *rdhA3* gene clusters of AA1<sup>T</sup> [21], were also present in the  
299 corresponding gene clusters of DBB and MSL71<sup>T</sup> (Fig. 3). Likewise, genes encoding the  
300 LuxR and MarR-type regulators are present up- and downstream of the *rdhA2* gene  
301 clusters of DBB and MSL71<sup>T</sup>, in line with the organization of the *rdhA2* gene cluster of  
302 AA1<sup>T</sup> (Fig. 3). This may indicate similar regulation systems of the *rdh* genes in the  
303 *Desulfoluna* strains studied here. The conserved motifs from known RDases (RR, C1–C5,  
304 FeS1, and FeS2) [55, 56] are also conserved among all the RdhAs of the *Desulfoluna*  
305 strains, except for RdhA1 of MSL71<sup>T</sup> which lacks the RR motif (Fig. S6). This may indicate  
306 a cytoplasmic localization and a non-respiratory role of the RdhA1 in strain MSL71<sup>T</sup> [6].

307

### 308 **OHR metabolism of *D. butyratoxydans* MSL71<sup>T</sup>**

309         Guided by the genomic potential of strain MSL71<sup>T</sup> for OHR, physiological  
310 experiments in this study indeed confirmed that strain MSL71<sup>T</sup> is capable of using 2-BP,  
311 2,4-DBP, 2,6-DBP and 2,4,6-TBP as electron acceptors with lactate as the electron donor.  
312 Similar to DBB and AA1<sup>T</sup>, chlorophenols such as 2,4-DCP, 2,6-DCP and 2,4,6-TCP were  
313 not dehalogenated by strain MSL71<sup>T</sup> (Table 1). In contrast to strains DBB and AA1<sup>T</sup>,  
314 strain MSL71<sup>T</sup> was unable to debrominate 1,4-DBB and 4-BP. Hence, debromination of  
315 2,4-DBP and 2,4,6-TBP was incomplete with 4-BP as the final product rather than phenol  
316 (Table 1). Moreover, strain MSL71<sup>T</sup> was unable to deiodinate 2-IP and 4-IP, again in  
317 contrast to strains DBB and AA1<sup>T</sup> (Fig. S7, Table 1).

318

### 319 **Induction of *rdhA* genes during OHR by strain DBB**

320         When strain DBB was grown with sulfate and 1,4-DBB with concomitant  
321 production of BB (Fig. 4A), its *rdhA1* gene showed significant up-regulation (60-fold) at  
322 24 h, reached its highest level (120-fold) at 48 to 72 h, and then decreased (Fig. 4B). In  
323 contrast, no significant up-regulation of *rdhA2* or *rdhA3* was noted, suggesting that  
324 RdhA1 mediates 1,4-DBB debromination. Accordingly, RdhA1 was found in the proteome  
325 of the LSD growth condition but not in that of the LS condition (Table S4, Dataset S1 and  
326 S2). When strain DBB was grown with sulfate and 2,6-DBB, both *rdhA1* and *rdhA3* were  
327 significantly up-regulated and reached their highest level at 4 h (65- and 2000-fold,  
328 respectively, Fig. 4D). However, *rdhA3* was the dominant gene at 8 h (Fig. 4D), after  
329 which 2-BP was debrominated to phenol (Fig. 4C) indicating a role of RdhA3 in 2,6-DBP  
330 and 2-BP debromination by strain DBB. A previous transcriptional study of the *rdhA*  
331 genes in strain AA1<sup>T</sup> during 2,6-DBP debromination also showed a similar induction of its  
332 *rdhA3* [21].

333

### 334 **Corrinoid biosynthesis in *Desulfoluna* strains**

335 Most known RDases depend on corrinoid cofactors such as cyanocobalamin for  
336 dehalogenation activity [10]. Both strains DBB (this study) and AA1<sup>T</sup> [21] were capable  
337 of OHR in the absence of externally added cobalamin. With one exception (*cbiJ*), the  
338 genomes of the *Desulfoluna* strains studied here harbor all genes necessary for *de novo*  
339 anaerobic corrinoid biosynthesis starting from glutamate (Table S5). The genes for  
340 cobalamin biosynthesis from precorrin-2 are arranged in one cluster (DBB\_3730–3920,  
341 AA1\_12810–12829, MSL71\_49290–49480) including an ABC transporter (*btuCDF*) for  
342 cobalamin import (Fig. 5). Another small cobalamin-related gene cluster was detected in  
343 the *Desulfoluna* genomes (DBB\_52170–52260, AA1\_10815–10826, MSL71\_44540–  
344 44630), which includes genes coding for the outer membrane corrinoid receptor BtuB and  
345 a second copy of the corrinoid-transporter BtuCDF plus another BtuF. Additionally,  
346 cobaltochelatase CbiK as well as a putative cobaltochelatase CobN are encoded in this  
347 gene cluster. The latter is usually involved only in the aerobic cobalamin biosynthesis  
348 pathway, and its function in *Desulfoluna* strains is unknown. Three of the proteins  
349 encoded by DBB\_3730–3920 (CbiK: 3730, CbiL: 3790, CbiH: 3850) were detected in the  
350 proteome of cells grown under both the LS and LSD conditions (Table S4, Dataset S1).  
351 The abundance of the cobalamin biosynthesis proteins was not significantly different  
352 between LS and LSD conditions (Table S4, Dataset S1 and S2), except for the  
353 tetrapyrrole methylase CbiH encoded by DBB\_3850 that was significantly more abundant  
354 in LSD cells (Table S4, Dataset S1). The detection of cobalamin biosynthesis proteins in  
355 the absence of 1,4-DBB in LS condition could be due to the synthesis of corrinoid-  
356 dependent enzymes in the absence of an organohalogen. Accordingly, three corrinoid-  
357 dependent methyltransferase genes (encoded by DBB\_7090, 43520, 16050) were  
358 detected in the proteomes, which might be involved in methionine, methylamine or o-  
359 demethylation metabolism. This might also indicate a constitutive expression of the  
360 corresponding genes, in contrast to the organohalide-induced cobalamin biosynthesis in  
361 *Sulfurospirillum multivorans* [57].

362

363 **Sulfur metabolism and impact of sulfate and sulfide on debromination by**  
364 ***Desulfoluna* strains**

365 All three strains were capable of using sulfate, sulfite, and thiosulfate as the  
366 terminal electron acceptors (Table 1). Four sulfate permease genes are present in the  
367 genomes of the *Desulfoluna* strains (Table S6), and one of the sulfate permeases  
368 (DBB\_22290) was detected in DBB cells grown under LS and LSD conditions (Table S4,  
369 Dataset S2). The genes involved in sulfate reduction, including those encoding sulfate  
370 adenylyltransferase (Sat), APS reductase (AprBA) and dissimilatory sulfite reductase  
371 (DsrAB), were identified in the genomes of all three strains (Table S6). The  
372 corresponding proteins were detected in DBB cells grown under both LS and LDS  
373 conditions (Fig. 6, Table S4) with AprBA, disulfite reductase (DsrMKJOP) and Sat among  
374 the most abundant proteins in both, soluble and membrane fractions (Dataset S1 and  
375 S2). Tetrathionate reductase encoding genes (*ttrA*) were found only in the genomes of  
376 strains DBB and AA1<sup>T</sup>. Interestingly, thiosulfate reductase genes were not found in any of  
377 the three genomes, whereas all strains can use thiosulfate as the electron acceptor  
378 (Table 1). *Desulfitobacterium metallireducens* was also reported to reduce thiosulfate  
379 despite lacking a known thiosulfate reductase gene [58, 59], suggesting the existence of  
380 a not-yet-identified gene encoding a thiosulfate reductase [59]. Possible alternatives are  
381 genes encoding rhodanese-like protein (RdIA) (Table S6) [60] or the three-subunit,  
382 periplasmic molybdopterin oxidoreductase (Table S6), as a putative polysulfide reductase  
383 (Psr) [61].

384 Sulfate and sulfide are known inhibitors of many OHRB [30, 62, 63]. However,  
385 debromination of 2,6-DBP was not affected in *Desulfoluna* strains in the presence of up to  
386 20 mM sulfate (Fig. S8B, D, F), and sulfate and 2,6-DBP were reduced concurrently (Fig.  
387 S8). This is similar to some other *Deltaproteobacteria* [23], but in contrast to *D. tiedjei*  
388 which preferentially performs sulfate reduction over OHR with concomitant down-  
389 regulation of *rdh* gene expression [30]. Moreover, sulfide, an RDase inhibitor in *D. tiedjei*  
390 [64] and *Dehalococcoides mccartyi* strains [28, 29], did not impact 2,6-DBP  
391 debromination by *Desulfoluna* strains at a concentration of 10 mM (Fig. S9A–F).

392 However, debromination was delayed in the presence of 20 mM sulfide, and no  
393 debromination was noted in the presence of 30 mM sulfide (Fig. S9G—L). This high  
394 resistance to sulfide was not reported before for the known OHRB, and is also rare  
395 among sulfate-reducing bacteria [65], and may confer an ecological advantage to these  
396 sulfate-reducing OHRB. Although hydrogen sulfide can be oxidized abiotically or serve as  
397 electron donor for sulfide-oxidizing microorganisms [66], naturally sustained and high  
398 concentrations of hydrogen sulfide are found in some marine environments [67].

399

#### 400 **Electron transport chains of strain DBB**

401 Two lactate dehydrogenases (LdhA-1/2, DBB\_24880/24970) with HdrD-like  
402 putative iron-sulfur subunits (LdhB-1/2, DBB\_24870/24960) were found in the proteome  
403 of DBB cells grown under LS and LSD conditions. Similar Ldhs were reported to be  
404 essential for the growth of *Desulfovibrio alaskensis* G20 with lactate and sulfate [68].  
405 Similar to *D. alaskensis* G20 and *D. vulgaris* strain Hildenborough [68, 69], the two Ldhs  
406 were encoded by an organic acid oxidation gene cluster (DBB\_24870—24970) including  
407 genes encoding lactate permease (DBB\_24890), the Ldhs and pyruvate oxidoreductase  
408 (Por, DBB\_24940). Based on previous studies with *D. vulgaris* Hildenborough [70], the  
409 electron transport pathway in strain DBB with lactate and sulfate could take one of the  
410 following routes: the Ldh's either reduce menaquinone directly [70], or transfer electrons  
411 via the HdrD-like subunit [71] and DsrC (DBB\_370, a high redox potential electron  
412 carrier with disulfide/dithiol (RSS/R(SH)<sub>2</sub>) to QmoA [72]. The pyruvate produced by  
413 lactate oxidation is further oxidized by Por (DBB\_310/24940), and the released electrons  
414 are carried/transferred by a flavodoxin (DBB\_37290). From there, the electrons from the  
415 low-potential ferredoxin and the electrons from the high-potential (disulfide bond) DsrC  
416 could be confurcated to QmoABC, which reduces menaquinone (Fig. 6A, B). The electrons  
417 are then transferred from menaquinol to the APS reductase (AprBA, DBB\_23880—890)  
418 which is, together with three other enzyme complexes (Sat, encoded by DBB\_23930,  
419 DsrABD, DBB\_25620—640, and DsrMKJOP, DBB\_27290—330), responsible for the sulfate  
420 reduction cascade (Santos et al., 2015).

421           The electron transport chain from Ldh to menaquinones or QmoABC during OHR is  
422 likely shared with sulfate reduction. Electron transport from menaquinol ( $E^{0'} = -75$  mV)  
423 to the RDase ( $E^{0'}$  (CoII/CoI)  $\approx -360$  mV) is thermodynamically unfavorable (Schubert et  
424 al., 2018), and the proteins involved to overcome this barrier have not been identified  
425 and most likely are not the same in different organohalide-respiring bacterial genera.  
426 Based on the genomic and proteomic analyses of strain DBB, we identified several  
427 possible electron transfer proteins connecting the menaquinone pool and RdhA1. The first  
428 is the membrane-integral protein RdhC1 (encoded by DBB\_38380, Fig. 3), a homolog of  
429 proteins previously proposed to function as transcriptional regulator for *rdhAB* gene  
430 expression in *Desulfitobacterium dehalogenans* [73]. However, a recent study on PceC  
431 from *Dehalobacter restrictus* proposed a possible role for RdhC in electron transfer from  
432 menaquinones to PceA via its exocyttoplasmically-facing flavin mononucleotide (FMN) co-  
433 factor [16]. RdhC in *Desulfoluna* strains also showed the conserved FMN binding motif (in  
434 particular the fully conserved threonine residue) and two CX<sub>3</sub>CP motifs predicted to have  
435 a role in electron transfer [16] (Fig. S10). Moreover, the five transmembrane helices of  
436 RdhC in DBB were also conserved (Fig. S11), indicating a possible function of RdhC1 in  
437 electron transfer from menaquinones to RdhA1 (Fig. 6A). However, RdhC1 was not found  
438 in our proteomic analysis, probably due to tight interaction with the membrane.

439           A second link between menaquinol/QmoABC and RdhA1 could be the Fix complex  
440 homolog, an electron transfer flavoprotein complex found in nitrogen-fixing  
441 microorganisms such as *Azotobacter vinelandii* and *Rhodospirillum rubrum* [74, 75]. The  
442 Fix complex is capable of using electron bifurcation to generate low-potential reducing  
443 equivalents for nitrogenase [74]. Strain DBB does not encode the minimum genes  
444 necessary for nitrogen fixation [76]. Hence, the Fix complex in DBB cells is likely linked  
445 to other cellular processes. Induction of the *fix* genes under OHR conditions was reported  
446 in other OHRB such as *Desulfitobacterium hafniense* TCE1 [77], and the corresponding  
447 Fix complex was suggested to provide low-redox-potential electrons for OHR. However,  
448 the obligate organohalide-respiring *Dehalobacter* spp., which are phylogenetically related  
449 to *Desulfitobacterium* spp., do not encode FixABC, questioning a general role of Fix



450 complex in OHR (Türkowsky et al., 2018). In strain DBB, the abundance of FixABC  
451 (encoded by DBB\_25970–990) was not higher in the cells grown under LDS as opposed  
452 to LS condition, but FixAB were among the most abundant 10% proteins in the soluble  
453 fraction (Dataset S1), indicating a potential role in electron transfer in both sulfate  
454 reduction and OHR. In this scenario, FixABC accepts two electrons from menaquinol,  
455 subsequently bifurcating them to unidentified high- and low-potential electron acceptors  
456 (Fig. 6B). The low-potential electron acceptor may also serve as an electron carrier that  
457 transfers electrons from cytoplasm-facing FixABC to the exoplasm-facing RdhA1 via an  
458 as-yet-unidentified electron carrier across the membrane [78] (Fig. 6B).

459 A third scenario is the involvement of QmoABC- and QrcABCD-mediated reverse  
460 electron transport (Fig. 6C), similar to the electron transport system of *D. alaskensis* G20  
461 cultivated in syntrophic interaction with *Methanococcus maripaludis* [68]. The electron  
462 transport from menaquinol to the periplasmic hydrogenase or formate dehydrogenase in  
463 strain G20 also needs to overcome an energy barrier similar to that of OHR (redox  
464 potential of  $H_2/H^+$  and formate/ $CO_2$  are  $-414$  mV and  $-432$  mV, respectively) [68]. In  
465 this scenario, lactate is oxidized to pyruvate as described above, transferring electrons to  
466 a thiol-disulfide redox pair. Pyruvate is oxidized by Por and the electrons are accepted by  
467 the flavodoxin. QmoABC then confurcates electrons from the low-potential ferredoxin and  
468 the high-potential thiol-disulfide redox pair to drive reduction of menaquinones. Electrons  
469 are transferred from menaquinol to RdhA1 via QrcABCD by reverse electron transport  
470 (Fig. 6C). The energy required for reverse electron transport is likely derived from the  
471 proton motive force mediated by QrcABCD [79]. In this scenario, QmoABC plays a key  
472 role in the metabolism of strain DBB as a link between sulfate reduction and OHR. This  
473 electron transport pathway provides a possible explanation for the increased 1,4-DBB  
474 debromination rate by DBB when sulfate is concurrently present (Fig. 1E, Fig. S1B).  
475 Hence, sulfate reduction may stimulate the electron confurcation process that is also  
476 used for OHR. Moreover, sulfate reduction can generate the proton motive force required  
477 for the reverse electron transport from QmoABC to RdhA1. Qmo and Qrc complexes are  
478 frequently found in sulfate-reducing *Deltaproteobacteria* and were proposed to be

479 involved in energy conservation [71, 80, 81]. However, biochemical studies with sulfate-  
480 reducing OHRB are necessary to further corroborate such a reverse electron flow and the  
481 intricate relationship of electron transfer in sulfate reduction and OHR.

482

### 483 **Potential oxygen defense in *Desulfoluna* strains**

484 Sulfate reducers, which have been assumed to be strictly anaerobic bacteria, not  
485 only survive oxygen exposure but also can utilize it as an electron acceptor [82, 83].  
486 However, the response of organohalide-respiring sulfate reducers to oxygen exposure is  
487 not known. Most of the described OHRB are strict anaerobes isolated from anoxic and  
488 usually organic matter-rich subsurface environments [17]. In contrast, strain DBB was  
489 isolated from marine intertidal sediment mainly composed of shore sand (Fig. 1A), where  
490 regular exposure to oxic seawater or air can be envisaged. The genomes of the  
491 *Desulfoluna* strains studied here harbor genes encoding enzymes for oxygen reduction  
492 and reactive oxygen species (ROS) detoxification (Table S7). Particularly, the presence of  
493 a cytochrome *c* oxidase is intriguing and may indicate the potential for oxygen  
494 respiration. Accordingly, in the presence of 2% oxygen in the headspace of DBB cultures,  
495 the redox indicator resazurin in the medium turned from pink to colorless within two  
496 hours, indicating consumption/reduction of oxygen by strain DBB. Growth of strain DBB  
497 on lactate and sulfate was retarded in the presence of 2% oxygen (Fig. S12C). However,  
498 in both the presence (Fig. S12C) and absence of sulfate (Fig. S12D), slower but complete  
499 debromination of 2,6-DBP to phenol was achieved with 2% oxygen in the headspace.  
500 Neither growth nor 2,6-DBP debromination was observed with an initial oxygen  
501 concentration of 5% in the headspace (Fig. S12E, F). Such resistance of marine OHRB to  
502 oxygen may enable them to occupy niches close to halogenating organisms/enzymes  
503 that nearly all use oxygen or peroxides as reactants [84]. For instance, the marine  
504 sponge *A. aerophoba* from which *D. spongiiphila* AA1<sup>T</sup> was isolated [20] harbors bacteria  
505 with a variety of FADH<sub>2</sub>-dependent halogenases [85], and produces a variety of  
506 brominated secondary metabolites [53]. Testing survival and OHR of *Desulfoluna* strains  
507 under continuous oxygen exposure and studying the mechanisms of oxygen defense as

508 studied in *Sulfurospirillum multivorans* [11] are necessary to further unravel oxygen  
509 resistance/metabolism mechanisms in *Desulfoluna* strains.

510

## 511 **Conclusions**

512 Widespread environmental contamination with organohalogen compounds and  
513 their harmful impacts to human and environmental health has been the driver of chasing  
514 OHRB since the 1970s. In addition, the environment itself is an ample and ancient source  
515 of natural organohalogens, and accumulating evidence shows widespread occurrence of  
516 *rdhA* in marine environments [6]. The previous isolation and description of strain AA1<sup>T</sup>  
517 from a marine sponge, the isolation of strain DBB from intertidal sediment samples, and  
518 verification of the OHR potential of strain MSL71<sup>T</sup> in this study indicate niche  
519 specialization of the members of the genus *Desulfoluna* as chemoorganotrophic  
520 facultative OHRB in marine environments rich in sulfate and organohalogens. As such, *de*  
521 *novo* corrinoid biosynthesis, resistance to sulfate, sulfide and oxygen, versatility in using  
522 electron donors, and the capacity for concurrent sulfate and organohalogen respiration  
523 confer an advantage to *Desulfoluna* strains in marine environments. Interestingly,  
524 approximately 10% of the sequenced deltaproteobacterial genomes, that have mostly  
525 been obtained from marine environments, contain one or multiple *rdh* genes [22, 23],  
526 and OHR metabolism was experimentally verified in three strains not previously known  
527 as OHRB [23]. These findings reinforce an important ecological role of sulfate-reducing  
528 organohalide-respiring *Deltaproteobacteria* in sulfur, halogen and carbon cycling in a  
529 range of marine environments.

530

## 531 **Acknowledgements**

532 We would like to thank Johanna Gutleben and Maryam Chaib de Mares for  
533 sediment sampling, W. Irene C. Rijpstra for fatty acid analysis, and Andreas Marquardt  
534 (Proteomics Centre of the University of Konstanz) for proteomic analyses. We  
535 acknowledge the China Scholarship Council (CSC) for the support to PP and YL. The  
536 authors thank BE-BASIC funds (grants F07.001.05 and F08.004.01) from the Dutch

537 Ministry of Economic Affairs, ERC grant (project 323009), the Gravitation grant (project  
538 024.002.002) of the Netherlands Ministry of Education, Culture and Science and the  
539 Netherlands Science Foundation (NWO), and National Natural Science Foundation of  
540 China (project No.51709100) for funding.

541

## 542 **Figure legends**

543 **Figure 1.** Enrichment and isolation of *D. spongiiphila* DBB. Intertidal sediment mainly  
544 composed of shore sediment used for isolation (A). Reductive debromination of 1,4-DBB  
545 by: the original microcosms containing intertidal sediment (B), the sediment-free  
546 enrichment cultures (C), the most diluted culture ( $10^7$ ) in the dilution series (D).  
547 Phylogenetic analysis of bacterial communities in the microcosms from the shore  
548 sediment at time zero (left), the original 1,4-DBB debrominating enrichment culture after  
549 104 days incubation (middle) and the  $10^7$  dilution series culture (right) (E). Reductive  
550 debromination of 1,4-DBB by the isolated pure culture (F). Sediment enrichment culture  
551 and sediment-free transfer cultures (B–D) were prepared in single bottles. Pure cultures  
552 (F) were prepared in duplicate bottles. Points and error bars represent the average and  
553 standard deviation of samples taken from the duplicate cultures. Phylogenetic data are  
554 shown at phylum level, except *Deltaproteobacteria* shown at class level and *Desulfoluna*  
555 at genus level. Taxa comprising less than 1% of the total bacterial community are  
556 categorized as 'Others'.

557 **Figure 2.** Phylogenetic tree based on 16S rRNA gene sequence and protein domain  
558 analyses. A comparison is included as horizontal lines between the two trees, showing  
559 the position of strain DBB relative to other strains belonging to the family  
560 *Desulfobacteraceae* as well as several *Desulfovibrio* strains. The "unique" nodes between  
561 the 16S rRNA gene- and domain-based tree are indicated with dashed lines. Genomes  
562 (Table S3) were selected based on the phylogenetic tree of the family  
563 *Desulfobacteraceae* [86].

564 **Figure 3.** Comparison of the *rdh* gene clusters in *D. spongiiphila* DBB, *D. spongiiphila*  
565 AA1<sup>T</sup> and *D. butyratoxydans* MSL71<sup>T</sup>. Numbers indicate the locus tags of the respective  
566 genes.

567 **Figure 4.** Debromination of 1,4-DBB (A) and 2,6-DBP (C) by *D. spongiiphila* DBB and  
568 relative induction of its three *rdhA* genes during debromination of 1,4-DBB (B) and 2,6-  
569 DBP (D). Error bars in panels A and C indicate the standard deviation of two random  
570 cultures analyzed out of 10 replicates. The concentration of 1,4-DBB (> 0.1 mM) could  
571 not be accurately measured due to large amount of undissolved compound and hence  
572 was not plotted. Error bars in panels B and D indicate standard deviation of triplicate RT-  
573 qPCRs performed on samples withdrawn from duplicate cultures at each time point (n =  
574 2 × 3).

575 **Figure 5.** Corrinoid biosynthesis and transporter gene clusters of *Desulfoluna* strains.  
576 Numbers indicate the locus tags of the respective genes. The corresponding enzymes  
577 encoded by the genes and their functions in corrinoid biosynthesis are indicated in Table  
578 S4.

579 **Figure 6.** Proposed electron transport pathways with OHR mediated by RdhC (A), Fix  
580 complex (B), Qmo/Qrc complexes (C) in *D. spongiiphila* DBB grown on lactate and sulfate  
581 (LS) and lactate, sulfate and 1,4-DBB (LSD). Corresponding gene locus tags are given for  
582 each protein. Log protein abundance ratios between LSD and LS grown cells are indicated  
583 next to the gene locus tag. Proteins shown in dashed line square were not detected  
584 under the tested conditions. Probable electron flow path is shown in red arrows, and the  
585 dashed red arrows indicate reverse electron transport.

586

587

## 588 References

589

- 590 1. Gribble GW. Naturally occurring organohalogen compounds—a comprehensive  
591 update, vol 91. (Springer, Vienna, 2010).
- 592 2. Gribble GW. A recent survey of naturally occurring organohalogen  
593 compounds. *Environ Chem.* 2015; 12:396-405.
- 594 3. Leri AC, Mayer LM, Thornton KR, Northrup PA, Dunigan MR, Ness KJ, et al. A  
595 marine sink for chlorine in natural organic matter. *Nat Geosci.* 2015; 8:620-624.
- 596 4. Méndez-Díaz JD, Shimabuku KK, Ma J, Enumah ZO, Pignatello JJ, Mitch WA, et al.  
597 Sunlight-driven photochemical halogenation of dissolved organic matter in  
598 seawater: a natural abiotic source of organobromine and organoiodine. *Environ  
599 Sci Technol.* 2014; 48:7418-7427.
- 600 5. Lavric ED, Konnov AA, De Ruyck J. Dioxin levels in wood combustion—a review.  
601 *Biomass Bioenergy.* 2004; 26:115-145.
- 602 6. Atashgahi S, Häggblom MM, Smidt H. Organohalide respiration in pristine  
603 environments: implications for the natural halogen cycle. *Environ Microbiol.* 2018;  
604 20:934-948.
- 605 7. Lu Y, Ramiro-Garcia J, Vandermeeren P, Herrmann S, Cichocka D, Springael D, et  
606 al. Dechlorination of three tetrachlorobenzene isomers by contaminated harbor  
607 sludge-derived enrichment cultures follows thermodynamically favorable  
608 reactions. *Appl Microbiol Biotechnol.* 2017; 101:2589-2601.
- 609 8. Mohn WW, Tiedje JM. Microbial reductive dehalogenation. *Microbiol Rev.* 1992;  
610 56:482-507.
- 611 9. Fincker M, Spormann AM. Biochemistry of catabolic reductive dehalogenation.  
612 *Annu Rev Biochem.* 2017; 86:357-386.
- 613 10. Schubert T, Adrian L, Sawers RG, Diekert G. Organohalide respiratory chains:  
614 composition, topology and key enzymes. *FEMS Microbiol Ecol.* 2018; 94:fiy035.
- 615 11. Gadkari J, Goris T, Schiffmann CL, Rubick R, Adrian L, Schubert T, et al. Reductive  
616 tetrachloroethene dehalogenation in the presence of oxygen by *Sulfurospirillum*  
617 *multivorans*: physiological studies and proteome analysis. *FEMS Microbiol Ecol.*  
618 2018; 94:fix176.
- 619 12. Kruse T, Smidt H, Lechner U. Comparative genomics and transcriptomics of  
620 organohalide-respiring bacteria and regulation of rdh gene transcription. In Adrian  
621 L, Löffler FE (ed), *Organohalide-Respiring Bacteria*. Springer, Berlin Heidelberg,  
622 2016, pp 345-376
- 623 13. Türkowsky D, Jehmlich N, Diekert G, Adrian L, von Bergen M, Goris T. An  
624 integrative overview of genomic, transcriptomic and proteomic analyses in  
625 organohalide respiration research. *FEMS Microbiol Ecol.* 2018; 94:fiy013.
- 626 14. Kublik A, Deobald D, Hartwig S, Schiffmann CL, Andrades A, von Bergen M, et al.  
627 Identification of a multi - protein reductive dehalogenase complex in  
628 *Dehalococcoides mccartyi* strain CBDB 1 suggests a protein-dependent respiratory  
629 electron transport chain obviating quinone involvement. *Environ Microbiol.* 2016;  
630 18:3044-3056.
- 631 15. Futagami T, Goto M, Furukawa K. Genetic system of organohalide-respiring  
632 bacteria. In Nojiri H, Tsuda M, Fukuda M, Kamagata Y (ed), *Biodegradative*  
633 *Bacteria*. Springer, Japan, 2014, pp 59-81
- 634 16. Buttet GF, Willemin MS, Hamelin R, Rupakula A, Maillard J. The membrane-bound  
635 C subunit of reductive dehalogenases: topology analysis and reconstitution of the  
636 FMN-binding domain of PceC. *Front Microbiol.* 2018; 9:755.
- 637 17. Atashgahi S, Lu Y, Smidt H. Overview of known organohalide-respiring bacteria—  
638 phylogenetic diversity and environmental distribution. In Adrian L, Löffler FE (ed),  
639 *Organohalide-Respiring Bacteria*. Springer, Berlin, Germany, 2016, pp 63-105
- 640 18. Hug LA, Maphosa F, Leys D, Löffler FE, Smidt H, Edwards EA, et al. Overview of  
641 organohalide-respiring bacteria and a proposal for a classification system for  
642 reductive dehalogenases. *Phil Trans R Soc B.* 2013; 368:20120322.

- 643 19. Futagami T, Morono Y, Terada T, Kaksonen AH, Inagaki F. Dehalogenation  
644 activities and distribution of reductive dehalogenase homologous genes in marine  
645 subsurface sediments. *Appl Environ Microbiol.* 2009; 75:6905-6909.
- 646 20. Ahn Y-B, Kerkhof LJ, Häggblom MM. *Desulfoluna spongiiphila* sp. nov., a  
647 dehalogenating bacterium in the *Desulfobacteraceae* from the marine sponge  
648 *Aplysina aerophoba*. *Int J Syst Evol Microbiol.* 2009; 59:2133-2139.
- 649 21. Liu J, Lopez N, Ahn YB, Goldberg T, Bromberg Y, Kerkhof LJ, et al. Novel reductive  
650 dehalogenases from the marine sponge associated bacterium *Desulfoluna*  
651 *spongiiphila*. *Environ Microbiol Rep.* 2017; 9:537-549.
- 652 22. Sanford RA, Chowdhary J, Löffler FE. Organohalide-Respiring *Deltaproteobacteria*.  
653 In Adrian L, Löffler FE (ed), *Organohalide-Respiring Bacteria*. Springer, Berlin  
654 Heidelberg, 2016, pp 235-258
- 655 23. Liu J, Häggblom MM. Genome-guided identification of organohalide-respiring  
656 *Deltaproteobacteria* from the marine environment. *mBio.* 2018; 9:e02471-18.
- 657 24. Atashgahi S. Discovered by genomics: putative reductive dehalogenases with N-  
658 terminus transmembrane helices. *FEMS Microbiol Ecol.* 2019; 95:fiz048.
- 659 25. Jochum LM, Schreiber L, Marshall IP, Jørgensen BB, Schramm A, Kjeldsen KU.  
660 Single-cell genomics reveals a diverse metabolic potential of uncultivated  
661 *Desulfatiglans*-related Deltaproteobacteria widely distributed in marine sediment.  
662 *Front Microbiol.* 2018; 9:2038.
- 663 26. Adrian L, Hansen SK, Fung JM, Görisch H, Zinder SH. Growth of *Dehalococcoides*  
664 strains with chlorophenols as electron acceptors. *Environ Sci Technol.* 2007;  
665 41:2318-2323.
- 666 27. May HD, Miller GS, Kjellerup BV, Sowers KR. Dehalorespiration with  
667 polychlorinated biphenyls by an anaerobic ultramicrobacterium. *Appl Environ*  
668 *Microbiol.* 2008; 74:2089-2094.
- 669 28. He J, Sung Y, Krajmalnik-Brown R, Ritalahti KM, Löffler FE. Isolation and  
670 characterization of *Dehalococcoides* sp. strain FL2, a trichloroethene (TCE)-and  
671 1,2-dichloroethene-respiring anaerobe. *Environ Microbiol.* 2005; 7:1442-1450.
- 672 29. Mao X, Polasko A, Alvarez-Cohen L. The effects of sulfate reduction on  
673 trichloroethene dechlorination by *Dehalococcoides*-containing microbial  
674 communities. *Appl Environ Microbiol.* 2017; 83:e03384-16.
- 675 30. Townsend GT, Suflita JM. Influence of sulfur oxyanions on reductive  
676 dehalogenation activities in *Desulfomonile tiedjei*. *Appl Environ Microbiol.* 1997;  
677 63:3594-3599.
- 678 31. Ahn Y-B, Rhee S-K, Fennell DE, Kerkhof LJ, Hentschel U, Häggblom MM. Reductive  
679 dehalogenation of brominated phenolic compounds by microorganisms associated  
680 with the marine sponge *Aplysina aerophoba*. *Appl Environ Microbiol.* 2003;  
681 69:4159-4166.
- 682 32. Suzuki D, Ueki A, Amaishi A, Ueki K. *Desulfoluna butyratoxydans* gen. nov., sp.  
683 nov., a novel Gram-negative, butyrate-oxidizing, sulfate-reducing bacterium  
684 isolated from an estuarine sediment in Japan. *Int J Syst Evol Microbiol.* 2008;  
685 58:826-832.
- 686 33. Monserrate E, Häggblom M. Dehalogenation and biodegradation of brominated  
687 phenols and benzoic acids under iron-reducing, sulfidogenic, and methanogenic  
688 conditions. *Appl Environ Microbiol.* 1997; 63:3911-3915.
- 689 34. Bui TPN, de Vos WM, Plugge CM. *Anaerostipes rhamnosivorans* sp. nov., a human  
690 intestinal, butyrate-forming bacterium. *Int J Syst Evol Microbiol.* 2014; 64:787-  
691 793.
- 692 35. Damsté JSS, Rijpstra WIC, Hopmans EC, Weijers JW, Foesel BU, Overmann J, et  
693 al. 13,16-Dimethyl octacosanedioic acid (*iso*-diabolic acid): A common membrane-  
694 spanning lipid of *Acidobacteria* subdivisions 1 and 3. *Appl Environ Microbiol.* 2011;  
695 77:4147-4154.
- 696 36. Atashgahi S, Lu Y, Zheng Y, Saccenti E, Suarez-Diez M, Ramiro-Garcia J, et al.  
697 Geochemical and microbial community determinants of reductive dechlorination at  
698 a site biostimulated with glycerol. *Environ Microbiol.* 2017; 19:968-981.

- 699 37. Ramiro-Garcia J, Hermes GD, Giatsis C, Sipkema D, Zoetendal EG, Schaap PJ, et  
700 al. NG-Tax, a highly accurate and validated pipeline for analysis of 16S rRNA  
701 amplicons from complex biomes. F1000Research. 2016; 5.
- 702 38. Edgar RC. Search and clustering orders of magnitude faster than BLAST.  
703 Bioinformatics. 2010; 26:2460-2461.
- 704 39. Quast C, Pruesse E, Yilmaz P, Gerken J, Schweer T, Yarza P, et al. The SILVA  
705 ribosomal RNA gene database project: improved data processing and web-based  
706 tools. Nucleic Acids Res. 2012; 41:D590-D596.
- 707 40. Caporaso JG, Kuczynski J, Stombaugh J, Bittinger K, Bushman FD, Costello EK, et  
708 al. QIIME allows analysis of high-throughput community sequencing data. Nat  
709 Methods. 2010; 7:335-336.
- 710 41. Chikhi R, Medvedev P. Informed and automated k-mer size selection for genome  
711 assembly. Bioinformatics. 2013; 30:31-37.
- 712 42. Bankevich A, Nurk S, Antipov D, Gurevich AA, Dvorkin M, Kulikov AS, et al.  
713 SPAdes: a new genome assembly algorithm and its applications to single-cell  
714 sequencing. J Comput Biol. 2012; 19:455-477.
- 715 43. Chakraborty M, Baldwin-Brown JG, Long AD, Emerson J. Contiguous and accurate  
716 de novo assembly of metazoan genomes with modest long read coverage. Nucleic  
717 Acids Res. 2016; 44:e147.
- 718 44. Camacho C, Coulouris G, Avagyan V, Ma N, Papadopoulos J, Bealer K, et al.  
719 BLAST+: architecture and applications. BMC Bioinformatics. 2009; 10:421.
- 720 45. Walker BJ, Abeel T, Shea T, Priest M, Abouelliel A, Sakthikumar S, et al. Pilon: an  
721 integrated tool for comprehensive microbial variant detection and genome  
722 assembly improvement. PLoS One. 2014; 9:e112963.
- 723 46. Bolger AM, Lohse M, Usadel B. Trimmomatic: a flexible trimmer for Illumina  
724 sequence data. Bioinformatics. 2014; 30:2114-2120.
- 725 47. Langmead B, Salzberg SL. Fast gapped-read alignment with Bowtie 2. Nature  
726 methods. 2012; 9:357-359.
- 727 48. Li H, Handsaker B, Wysoker A, Fennell T, Ruan J, Homer N, et al. The sequence  
728 alignment/map format and SAMtools. Bioinformatics. 2009; 25:2078-2079.
- 729 49. Peng P, Zheng Y, Koehorst JJ, Schaap PJ, Stams AJ, Smidt H, et al. Concurrent  
730 haloalkanoate degradation and chlorate reduction by *Pseudomonas*  
731 *chloritidismutans* AW-1<sup>T</sup>. Appl Environ Microbiol. 2017; 83:00325-17.
- 732 50. Wiczorek S, Combes F, Lazar C, Giai Gianetto Q, Gatto L, Dorffer A, et al. DAPAR  
733 & ProStaR: software to perform statistical analyses in quantitative discovery  
734 proteomics. Bioinformatics. 2017; 33:135-136.
- 735 51. Cline JD. Spectrophotometric determination of hydrogen sulfide in natural waters.  
736 Limnol Oceanogr. 1969; 14:454-458.
- 737 52. Wagner A, Cooper M, Ferdi S, Seifert J, Adrian L. Growth of *Dehalococcoides*  
738 *mccartyi* strain CBDB1 by reductive dehalogenation of brominated benzenes to  
739 benzene. Environ Sci Technol. 2012; 46:8960-8968.
- 740 53. Turon X, Becerro MA, Uriz MJ. Distribution of brominated compounds within the  
741 sponge *Aplysina aerophoba*: coupling of X-ray microanalysis with cryofixation  
742 techniques. Cell Tissue Res. 2000; 301:311-322.
- 743 54. Richter M, Rosselló-Móra R. Shifting the genomic gold standard for the prokaryotic  
744 species definition. Proc Natl Acad Sci USA. 2009; 106:19126-19131.
- 745 55. Smidt H, de Vos WM. Anaerobic microbial dehalogenation. Annu Rev Microbiol.  
746 2004; 58:43-73.
- 747 56. Lu Y, Atashgahi S, Hug LA, Smidt H. Primers that target functional genes of  
748 organohalide-respiring bacteria. In McGenity TJ, Timmis KN, Nogales B (ed),  
749 Hydrocarbon and Lipid Microbiology Protocols. Springer, Berlin, Heidelberg, 2015,  
750 pp 177-205
- 751 57. Goris T, Schiffmann CL, Gadkari J, Schubert T, Seifert J, Jehmlich N, et al.  
752 Proteomics of the organohalide-respiring Epsilonproteobacterium *Sulfurospirillum*  
753 *multivorans* adapted to tetrachloroethene and other energy substrates. Sci Rep.  
754 2015; 5:13794.



- 755 58. Finneran KT, Forbush HM, VanPraagh CVG, Lovley DR. *Desulfitobacterium*  
756 *metallireducens* sp. nov., an anaerobic bacterium that couples growth to the  
757 reduction of metals and humic acids as well as chlorinated compounds. *Int J Syst*  
758 *Evol Microbiol.* 2002; 52:1929-1935.
- 759 59. Kruse T, Goris T, Maillard J, Woyke T, Lechner U, de Vos W, et al. Comparative  
760 genomics of the genus *Desulfitobacterium*. *FEMS Microbiol Ecol.* 2017; 93:fix135.
- 761 60. Ravot G, Casalot L, Ollivier B, Loison G, Magot M. *rdIA*, a new gene encoding a  
762 rhodanese-like protein in Halanaerobium congolense and other thiosulfate-  
763 reducing anaerobes. *Res Microbiol.* 2005; 156:1031-1038.
- 764 61. Burns JL, DiChristina TJ. Anaerobic respiration of elemental sulfur and thiosulfate  
765 by *Shewanella oneidensis* MR-1 requires *psrA*, a homolog of the *phsA* gene of  
766 *Salmonella enterica* serovar typhimurium LT2. *Appl Environ Microbiol.* 2009;  
767 75:5209-5217.
- 768 62. Zanaroli G, Negroni A, Häggblom MM, Fava F. Microbial dehalogenation of  
769 organohalides in marine and estuarine environments. *Curr Opin Biotechnol.* 2015;  
770 33:287-295.
- 771 63. Weatherill JJ, Atashgahi S, Schneidewind U, Krause S, Ullah S, Cassidy N, et al.  
772 Natural attenuation of chlorinated ethenes in hyporheic zones: a review of key  
773 biogeochemical processes and in-situ transformation potential. *Water Res.* 2018;  
774 128:362-382.
- 775 64. DeWeerd KA, Suflita JM. Anaerobic aryl reductive dehalogenation of halobenzoates  
776 by cell extracts of "*Desulfomonile tiedjei*". *Appl Environ Microbiol.* 1990; 56:2999-  
777 3005.
- 778 65. Caffrey SM, Voordouw G. Effect of sulfide on growth physiology and gene  
779 expression of *Desulfovibrio vulgaris* Hildenborough. *Antonie Van Leeuwenhoek.*  
780 2010; 97:11-20.
- 781 66. Wasmund K, Mußmann M, Loy A. The life sulfuric: microbial ecology of sulfur  
782 cycling in marine sediments. *Environ Microbiol Rep.* 2017; 9:323-344.
- 783 67. Tobler M, Passow CN, Greenway R, Kelley JL, Shaw JH. The evolutionary ecology  
784 of animals inhabiting hydrogen sulfide-rich environments. *Annu Rev Ecol Evol*  
785 *Syst.* 2016; 47:239-262.
- 786 68. Meyer B, Kuehl J, Deutschbauer AM, Price MN, Arkin AP, Stahl DA. Variation  
787 among *Desulfovibrio* species in electron transfer systems used for syntrophic  
788 growth. *J Bacteriol.* 2013; 195:990-1004.
- 789 69. Vita N, Valette O, Brasseur G, Lignon S, Denis Y, Ansaldi M, et al. The primary  
790 pathway for lactate oxidation in *Desulfovibrio vulgaris*. *Front Microbiol.* 2015;  
791 6:606.
- 792 70. Keller KL, Wall JD. Genetics and molecular biology of the electron flow for sulfate  
793 respiration in *Desulfovibrio*. *Front Microbiol.* 2011; 2:135.
- 794 71. Pereira IA, Ramos AR, Grein F, Marques MC, Da Silva SM, Venceslau SS. A  
795 comparative genomic analysis of energy metabolism in sulfate reducing bacteria  
796 and archaea. *Front Microbiol.* 2011; 2:69.
- 797 72. Flowers JJ, Richards MA, Baliga N, Meyer B, Stahl DA. Constraint-based modelling  
798 captures the metabolic versatility of *Desulfovibrio vulgaris*. *Environ Microbiol Rep.*  
799 2018; 10:190-201.
- 800 73. Smidt H, van Leest M, van der Oost J, de Vos WM. Transcriptional regulation of  
801 the *cpr* gene cluster in ortho-chlorophenol-respiring *Desulfitobacterium*  
802 *dehalogenans*. *J Bacteriol.* 2000; 182:5683-5691.
- 803 74. Ledbetter RN, Garcia Costas AM, Lubner CE, Mulder DW, Tokmina-Lukaszewska M,  
804 Artz JH, et al. The electron bifurcating FixABCX protein complex from *Azotobacter*  
805 *vinelandii*: generation of low-potential reducing equivalents for nitrogenase  
806 catalysis. *Biochemistry.* 2017; 56:4177-4190.
- 807 75. Edgren T, Nordlund S. The *fixABCX* genes in *Rhodospirillum rubrum* encode a  
808 putative membrane complex participating in electron transfer to nitrogenase. *J*  
809 *Bacteriol.* 2004; 186:2052-2060.

- 810 76. Dos Santos PC, Fang Z, Mason SW, Setubal JC, Dixon R. Distribution of nitrogen  
811 fixation and nitrogenase-like sequences amongst microbial genomes. BMC  
812 Genomics. 2012; 13:162.
- 813 77. Prat L, Maillard J, Grimaud R, Holliger C. Physiological adaptation of  
814 *Desulfitobacterium hafniense* strain TCE1 to tetrachloroethene respiration. Appl  
815 Environ Microbiol. 2011; 77:3853-3859.
- 816 78. Kruse T, van de Pas BA, Atteia A, Krab K, Hagen WR, Goodwin L, et al. Genomic,  
817 proteomic, and biochemical analysis of the organohalide respiratory pathway in  
818 *Desulfitobacterium dehalogenans*. J Bacteriol. 2015; 197:893-904.
- 819 79. Duarte AG, Catarino T, White GF, Lousa D, Neukirchen S, Soares CM, et al. An  
820 electrogenic redox loop in sulfate reduction reveals a likely widespread mechanism  
821 of energy conservation. Nat Commun. 2018; 9:5448.
- 822 80. Venceslau SS, Lino RR, Pereira IA. The Qrc membrane complex, related to the  
823 alternative complex III, is a menaquinone reductase involved in sulfate  
824 respiration. J Biol Chem. 2010; 285:22774-22783.
- 825 81. Zane GM, Yen H-cB, Wall JD. Effect of the deletion of qmoABC and the promoter-  
826 distal gene encoding a hypothetical protein on sulfate reduction in *Desulfovibrio*  
827 *vulgaris* Hildenborough. Appl Environ Microbiol. 2010; 76:5500-5509.
- 828 82. Dolla A, Fournier M, Dermoun Z. Oxygen defense in sulfate-reducing bacteria. J  
829 Biotechnol. 2006; 126:87-100.
- 830 83. Fournier M, Zhang Y, Wildschut JD, Dolla A, Voordouw JK, Schriemer DC, et al.  
831 Function of oxygen resistance proteins in the anaerobic, sulfate-reducing  
832 bacterium *Desulfovibrio vulgaris* Hildenborough. J Bacteriol. 2003; 185:71-79.
- 833 84. Field JA. Natural production of organohalide compounds in the environment. In  
834 Adrian L, Löffler FE (ed), Organohalide-Respiring Bacteria. Springer, Berlin  
835 Heidelberg, 2016, pp 7-29
- 836 85. Bayer K, Scheuermayer M, Fieseler L, Hentschel U. Genomic mining for novel  
837 FADH<sub>2</sub>-dependent halogenases in marine sponge-associated microbial consortia.  
838 Mar Biotechnol 2013; 15:63-72.
- 839 86. Kuever J. The family *Desulfobacteraceae*, The Prokaryotes. Springer, 2014, pp 45-  
840 73

841

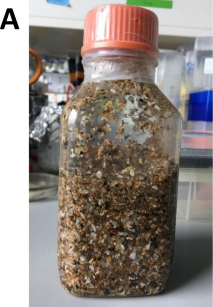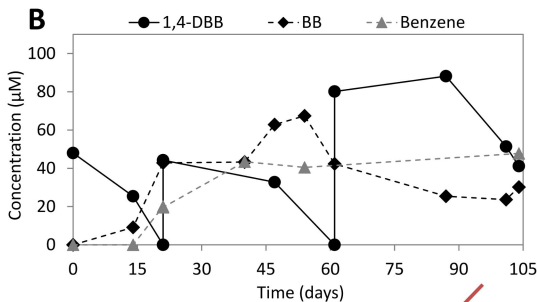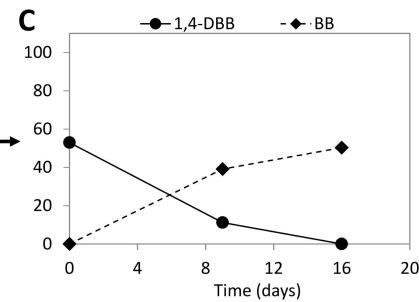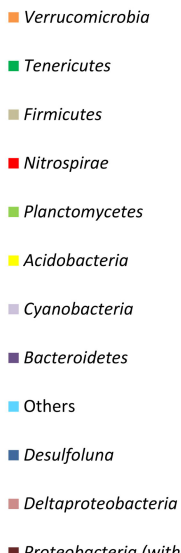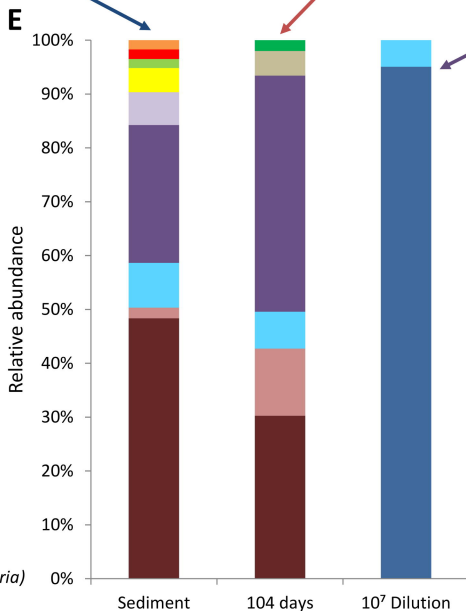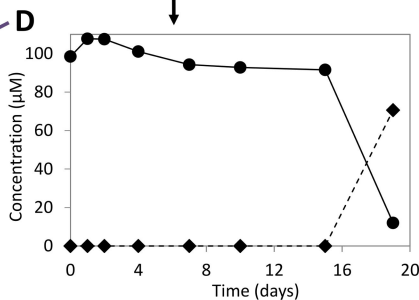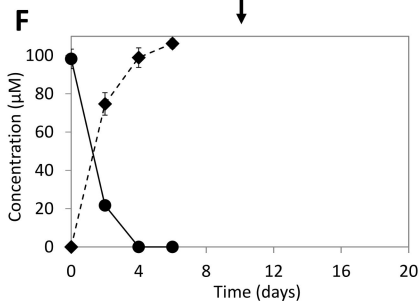

Pfam domains

16S rRNA genes

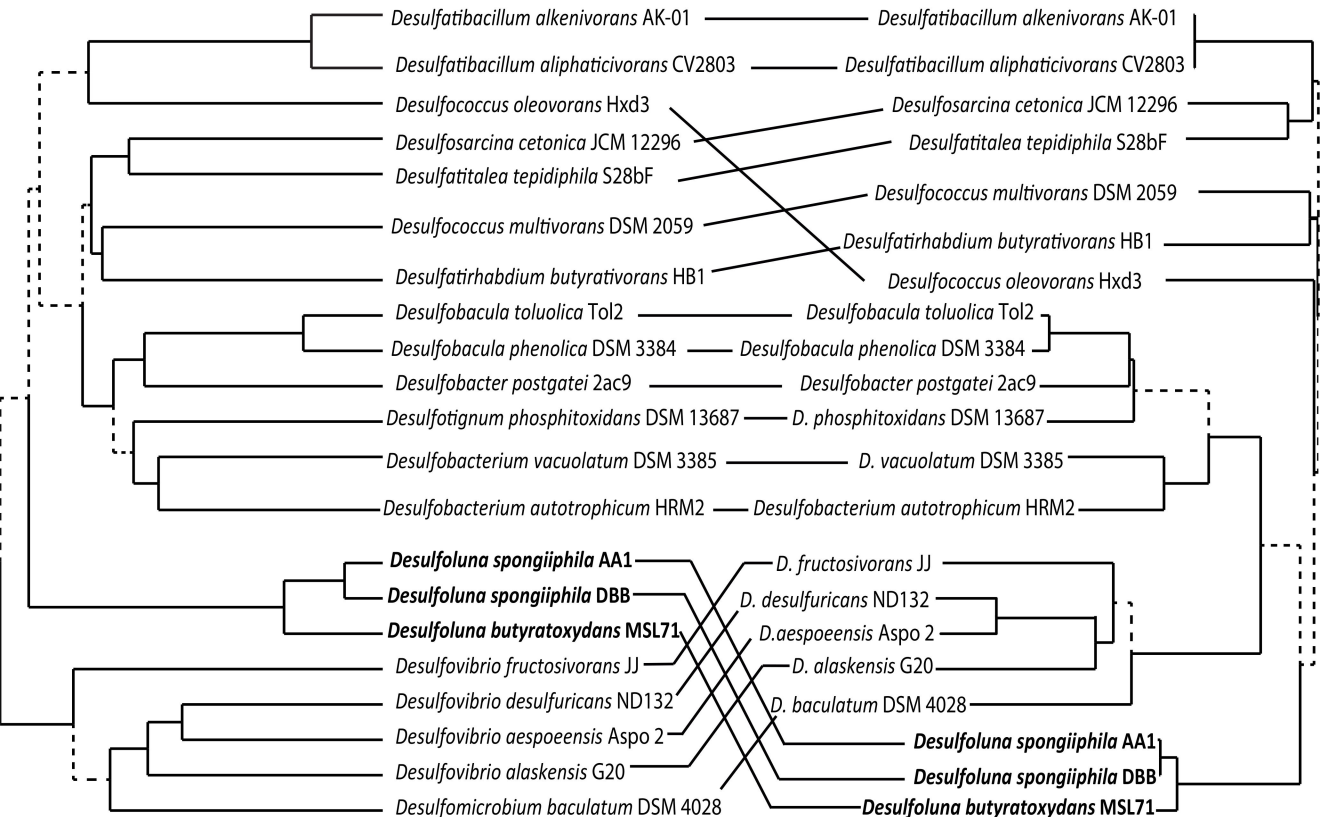

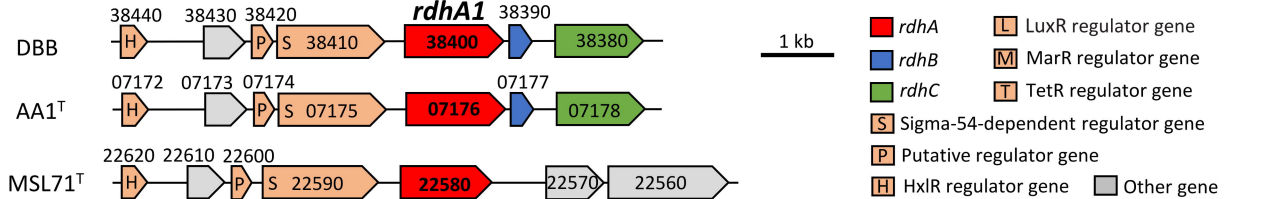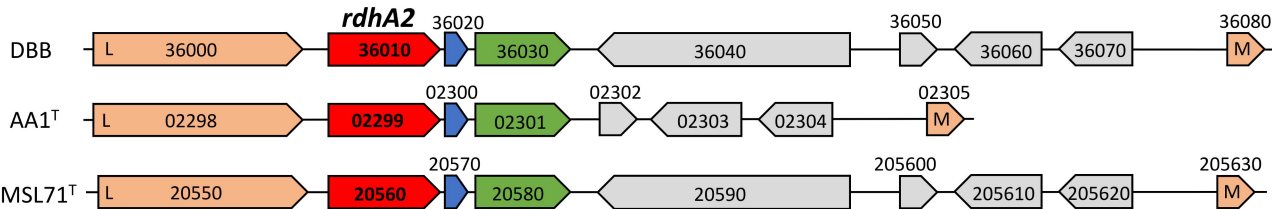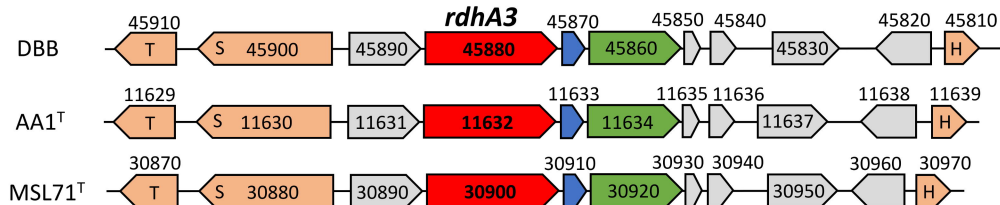

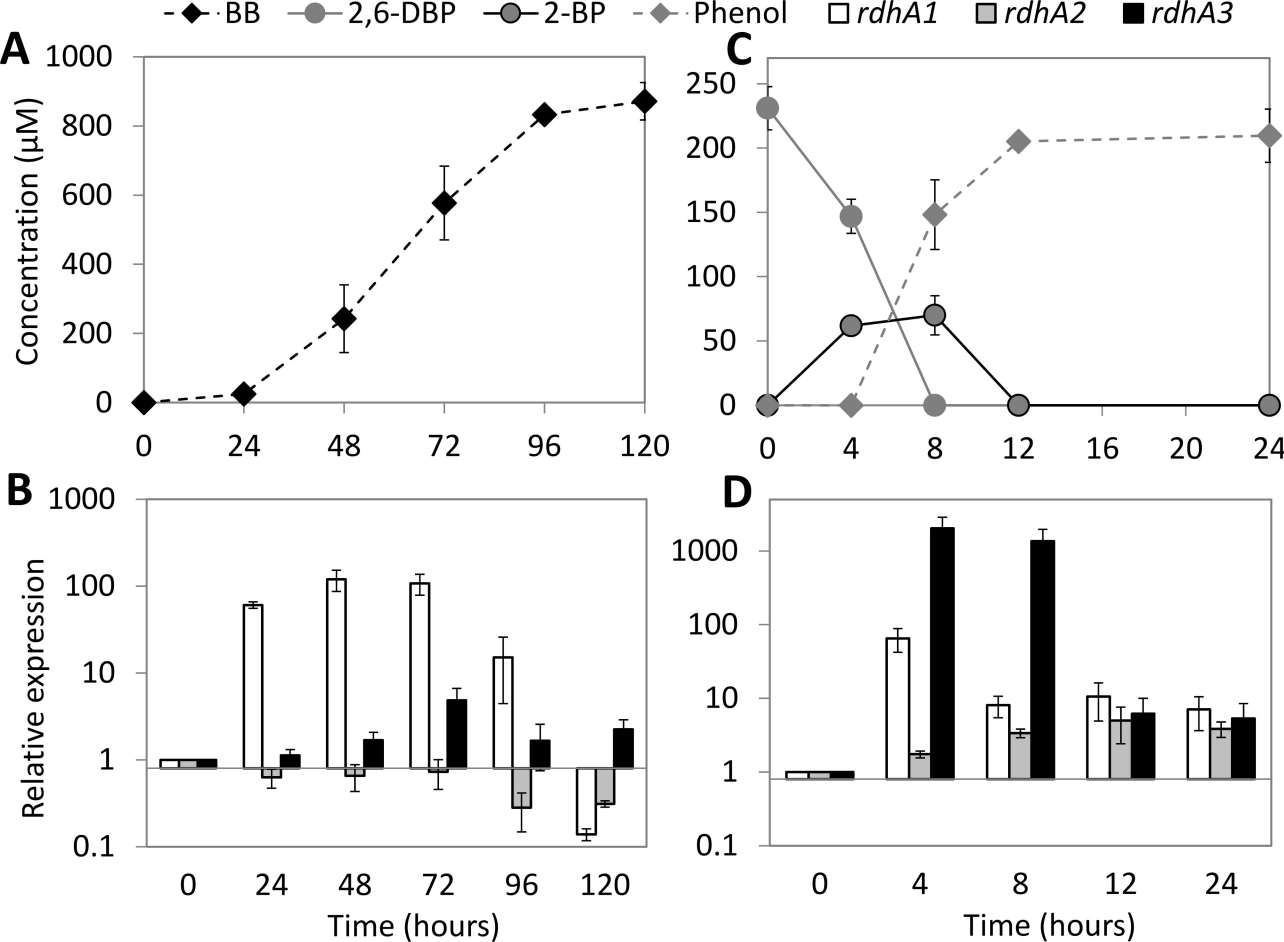

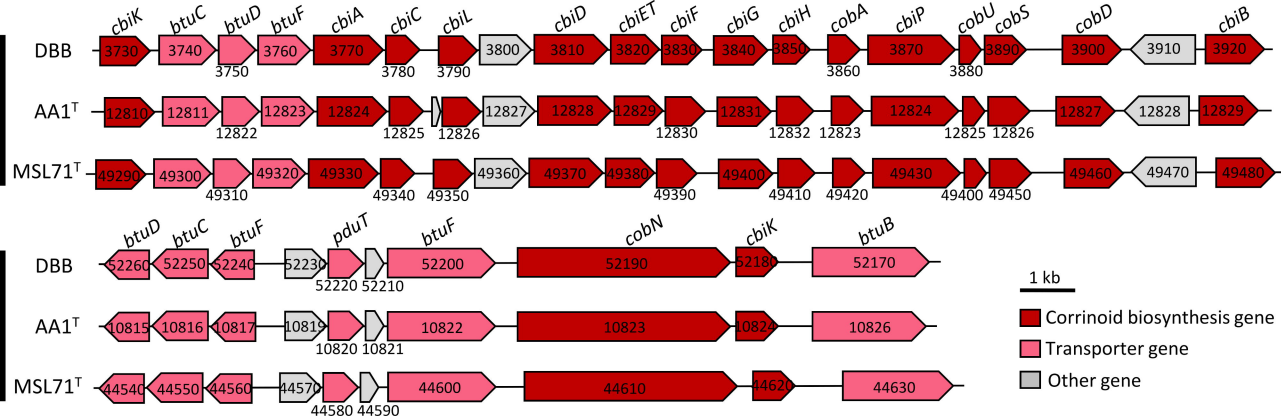

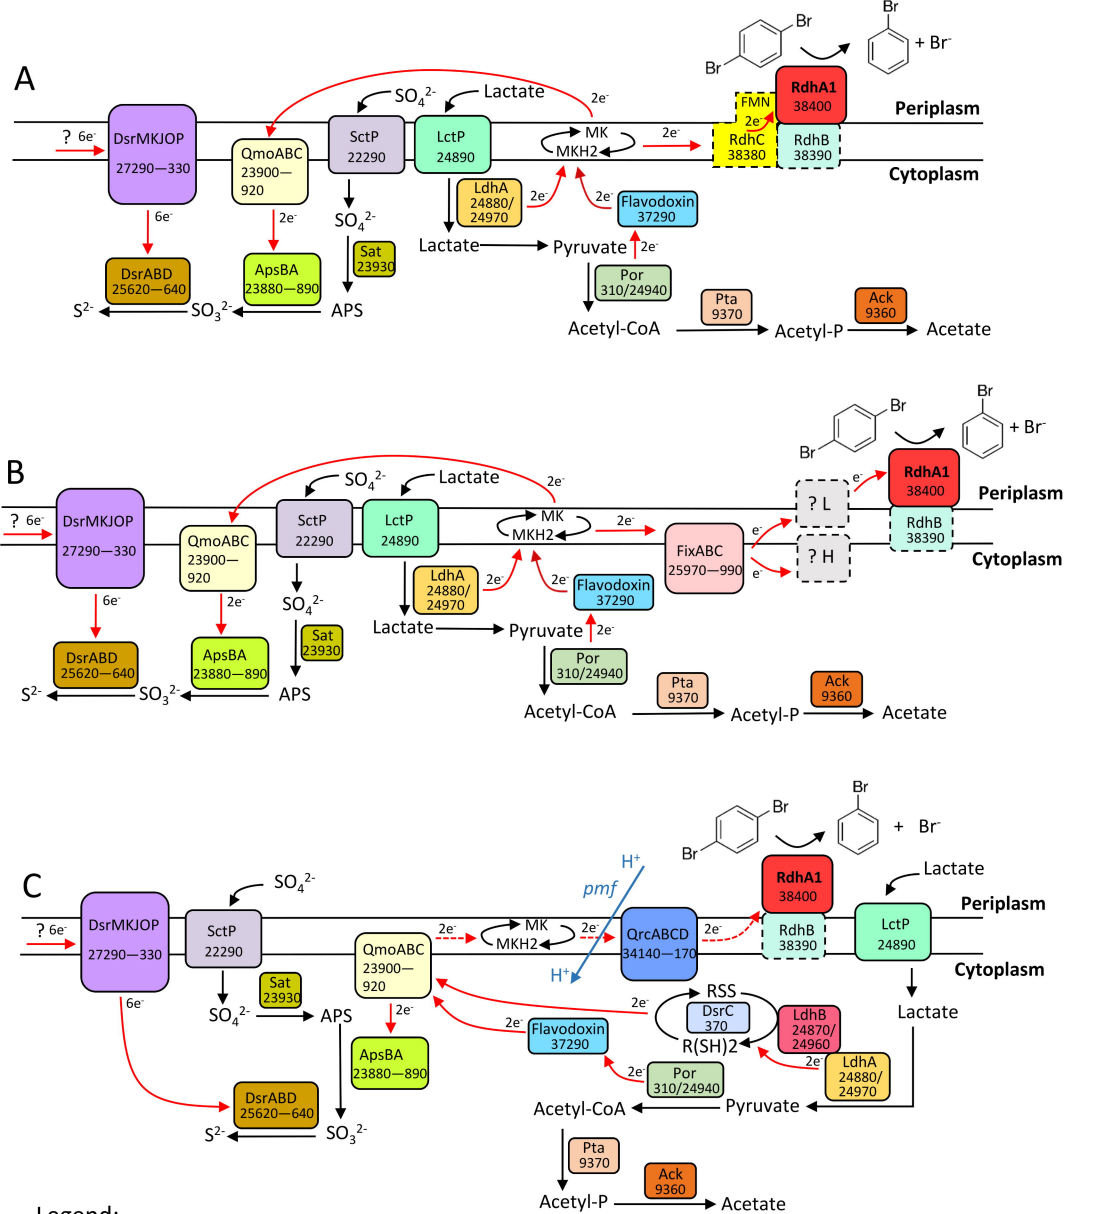



Table 1. Physiological and genomic properties of *Desulfoluna* strains

| Strain                                   | DBB                        | AA1 <sup>T a</sup> | MSL71 <sup>T b</sup> |
|------------------------------------------|----------------------------|--------------------|----------------------|
| Isolation source                         | Marine intertidal sediment | Marine sponge      | Estuarine sediment   |
| Cell morphology                          | Curved rods                | Curved rods        | Curved rods          |
| Optimum NaCl concentration (%)           | 2.0                        | 2.5                | 2.0                  |
| Temperature optimum/range (°C)           | 30/10–30                   | 28/10–36           | 30/ND <sup>c</sup>   |
| <b>Utilization of electron donors</b>    |                            |                    |                      |
| Lactate                                  | +                          | +                  | +                    |
| Butyrate                                 | +                          | -                  | +                    |
| Formate                                  | +                          | +                  | +                    |
| Acetate                                  | -                          | -                  | -                    |
| Fumarate                                 | -                          | -                  | -                    |
| Citrate                                  | -                          | +                  | -                    |
| Glucose                                  | -                          | +                  | -                    |
| Malate                                   | +                          | +                  | +                    |
| Pyruvate                                 | +                          | +                  | +                    |
| Hydrogen                                 | - <sup>d</sup>             | ND                 | ND                   |
| Propionate                               | -                          | -                  | -                    |
| Succinate                                | -                          | -                  | -                    |
| <b>Utilization of electron acceptors</b> |                            |                    |                      |
| Sulfate                                  | +                          | +                  | +                    |
| Sulfite                                  | +                          | +                  | +                    |
| Thiosulfate                              | +                          | +                  | +                    |
| 1,4-Dibromobenzene                       | +                          | + <sup>e</sup>     | - <sup>e</sup>       |
| 1,2-Dibromobenzene                       | -                          | ND                 | ND                   |
| 1,3-Dibromobenzene                       | -                          | ND                 | ND                   |
| 1,2,4-Tribromobenzene                    | -                          | ND                 | ND                   |
| Bromobenzene                             | -                          | ND                 | ND                   |
| 1,2-Dichlorobenzene                      | -                          | ND                 | ND                   |
| 1,3-Dichlorobenzene                      | -                          | ND                 | ND                   |
| 1,4-Dichlorobenzene                      | -                          | ND                 | ND                   |
| 1,2,4-Trichlorobenzene                   | -                          | ND                 | ND                   |
| 2-Bromophenol                            | +                          | +                  | + <sup>e</sup>       |
| 4-Bromophenol                            | +                          | +                  | - <sup>e</sup>       |
| 2,4-Dibromophenol                        | +                          | +                  | + <sup>e, f</sup>    |
| 2,6-Dibromophenol                        | +                          | +                  | + <sup>e</sup>       |
| 2,4,6-Tribromophenol                     | +                          | +                  | + <sup>e, f</sup>    |
| 2-Iodophenol                             | +                          | + <sup>e</sup>     | - <sup>e</sup>       |
| 4-Iodophenol                             | +                          | + <sup>e</sup>     | - <sup>e</sup>       |
| 2,4-Dichlorophenol                       | -                          | -                  | - <sup>e</sup>       |

|                       |      |                   |                   |
|-----------------------|------|-------------------|-------------------|
| 2,6-Dichlorophenol    | -    | -                 | - <sup>e</sup>    |
| 2,4,6-Trichlorophenol | -    | -                 | - <sup>e</sup>    |
| <hr/>                 |      |                   |                   |
| Genomic information   |      |                   |                   |
| <hr/>                 |      |                   |                   |
| Genome size (Mb)      | 6.68 | 6.53 <sup>g</sup> | 6.05 <sup>h</sup> |
| G+C content (%)       | 57.1 | 57.9 <sup>g</sup> | 57.2 <sup>h</sup> |
| Total genes           | 5497 | 5356 <sup>g</sup> | 4894 <sup>h</sup> |
| Total proteins        | 5301 | 5203 <sup>g</sup> | 4186 <sup>h</sup> |

<sup>a</sup> Data from Ahn et al. (Ahn et al 2009)

<sup>b</sup> Data from Suzuki et al. (Suzuki et al 2008)

<sup>c</sup> ND, not determined

<sup>d</sup> Tested with 1,4-dibromobenzene as the electron acceptor

<sup>e</sup> Data from this study

<sup>f</sup> 4-Bromophenol rather than phenol was the debromination product

<sup>g</sup> Data from GenBank (accession number: NZ\_FMUX01000001.1)

<sup>h</sup> Predicted based on draft genome
